# Supplementary material
Source: Copernicus journal article supplement (doi:10.5194/essd-18-2179-2026)
Supplement: Supplementary file 1 [file essd-18-2179-2026-supplement.pdf]

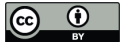

*Supplement of*

## **Australia's terrestrial industrial footprint and ecological intactness**

**Ruben Venegas-Li et al.**

*Correspondence to:* Ruben Venegas-Li ([r.venegas@uq.edu.au](mailto:r.venegas@uq.edu.au))

The copyright of individual parts of the supplement might differ from the article licence.

**Table S1. The 16 pressures used in this study classified into Level 1 and Level 2 of the IUCN-CMP Threats Classification framework v4.0. The number in front of the threat levels corresponds to the number assigned to each of these in the IUCN-CMP framework.**

| <b>Pressure</b>        | <b>IUCN classification- Level 1</b>            | <b>IUCN classification- Level 2</b>                                                                                                                                          |
|------------------------|------------------------------------------------|------------------------------------------------------------------------------------------------------------------------------------------------------------------------------|
| Intensive land uses    | 1 Residential, commercial & recreation areas   | 1.1. Residential Areas<br>1.2. Commercial & Industrial Areas<br>1.3. Recreation & Tourism Areas                                                                              |
|                        | 2 Agriculture and Aquaculture                  | 2.3 Terrestrial Animal Farming (Farm areas associated with infrastructure) Ranching, Herding<br>2.4 Marine and Freshwater Aquaculture (areas associated with infrastructure) |
| Buildings              | 1 Residential, commercial & recreation areas   | 1.1. Residential Areas<br>1.2. Commercial & Industrial Areas                                                                                                                 |
|                        | 2 Agriculture and Aquaculture                  | 2.1. Annual & Perennial Non-Timber Crops                                                                                                                                     |
| Pasturelands           | Agriculture and Aquaculture                    | 2.3 Terrestrial Animal Farming, Ranching & Herding                                                                                                                           |
| Forestry (plantations) | 2 Agriculture and Aquaculture                  | 2.2 Wood and Pulp Plantations                                                                                                                                                |
| Mining/Quarrying       | 3 Energy Production & Mining                   | 3.2 Mining and Quarrying                                                                                                                                                     |
| Roads                  | 4 Transportation, Service & Security Corridors | 4.1. Roads, Trails & Railroads                                                                                                                                               |
|                        | 6 Human Intrusion and Disturbance              | 6.1 Recreational activities<br>6.3 Other Human Disturbances                                                                                                                  |
|                        | 4 Transportation, Service & Security Corridors | 4.1. Roads, Trails & Railroads                                                                                                                                               |
| Railways               | 4 Transportation, Service & Security Corridors | 4.1. Roads, Trails & Railroads                                                                                                                                               |
| Oil Pipelines          | 4 Transportation, Service & Security Corridors | 4.2 Utility & Service lines                                                                                                                                                  |
| Gas Pipelines          | 4 Transportation, Service & Security Corridors | 4.2 Utility & Service lines                                                                                                                                                  |
| Transmission lines     | 4 Transportation, Service & Security Corridors | 4.2 Utility & Service lines                                                                                                                                                  |
| Population density     | 6 Human Intrusion and Disturbance              | 6.1 Recreational Activities                                                                                                                                                  |

### 6.3 Other Human Disturbances

|                     |                                             |                                 |
|---------------------|---------------------------------------------|---------------------------------|
| Hiking Trails       | 6 Human Intrusion and Disturbance           | 6.1 Recreational activities     |
|                     |                                             | 6.3 Other human disturbances    |
| Navigable waterways | 6 Human Intrusion and Disturbance           | 6.1 Recreational activities     |
|                     |                                             | 6.3 Other human disturbances    |
| Reservoirs/dams     | 7 Natural System Management & Modifications | 7.2 Dams & Water Management/Use |
| Farm dams           | 7 Natural System Management & Modifications | 7.2 Dams & Water Management/Use |

25

Note: This IUCN-CMP classification of the pressures considered in this study is provided as a conceptual crosswalk. Some IUCN-CMP threat classes correspond to more than one pressure in this study. This reflects differences in how similar threats manifest across landscapes. For example, ‘terrestrial animal farming’ (IUCN-CMP Level 2.3) is represented in both intensive land uses (areas dominated by agricultural infrastructure, such as feedlots, piggeries, and glasshouses) and pasturelands (extensive grazing areas without major built infrastructure) pressure layers. These pressures are treated separately to distinguish between different types and intensities of land-use modification, while remaining conceptually consistent with the broader IUCN-CMP framework.

Table S2. Scores assigned to each of the 16 pressures used to create the Australian Industrial Footprint Map.

35

| Pressure               | Score                                     | Details and references                                                                                                               |
|------------------------|-------------------------------------------|--------------------------------------------------------------------------------------------------------------------------------------|
| Intensive uses         | 10                                        | All intensive-use areas are given a score of 10                                                                                      |
| Buildings              | 10                                        | Areas with buildings that are within a 200m buffer from existing roads are given a score of 10                                       |
| Mining/Quarrying       | 10                                        | All mining and quarrying areas are given a score of 10                                                                               |
| Population Density     | 0 -10 continuous                          | Pressure score = $3.333 \times \log(\text{pop density} + 1)$                                                                         |
| Croplands              | 7                                         | All cropland areas are given a score of 7                                                                                            |
| Forestry (plantations) | 7                                         | All plantation forest areas are given a score of 7 (this study)                                                                      |
| Reservoir/dams         | 8 direct impacts,<br>0–8 indirect impacts | All reservoir areas are given a score of 8, decreasing exponentially outwards 500 m.                                                 |
| Farm dams              | 5                                         | All areas with farm dams are given a score of 5, including a 500 m buffer                                                            |
| Modified Pasturelands  | 6                                         | All modified pasture areas are given a score of 6                                                                                    |
| Native Pasturelands    | 2                                         | All intensive-use areas are given a score of 10                                                                                      |
| Roads - Sealed         | 8 direct impacts,<br>0–8 indirect impacts | All areas within a buffer of 300m of sealed roads have a score of 8, which then decreases exponentially outward 5 km.                |
| Roads- Unsealed        | 3 direct impacts,<br>0–3 indirect impacts | All areas within a buffer of 300m of unsealed roads have a score of 3, which then decreases exponentially outward 5 km..             |
| Railways               | 8 direct impacts                          | All areas along and within a 50m buffer on either side of railway lines have a score of 8                                            |
| Pipelines              | 3 direct impacts,<br>0–3 indirect impacts | All areas within a buffer of 100 m from the pipelines have a score of 3. Then it decreases from 3 to 0.25 up to 2.75 km.             |
| Transmission lines     | 3 direct impacts,<br>0–3 indirect impacts | All areas within a buffer of 100 m from the transmission lines have a score of 3. Then it decreases from 3 to 0 up to 2.75 km        |
| Hiking trails          | 0.9                                       | All areas along and within a 50 m buffer on either side of hiking trails have a score of 3                                           |
| Navigable waterways    | 4                                         | Areas directly alongside navigable waterways have a pressure of 4, which decreased exponentially outwards 15 km (Venter et al. 2016) |

**Table S3. Mining/Quarrying data layers used to complement the mining/quarrying data available in the CLUMP23 dataset.**

| State/Territory | Data                                                           | Resource                                                                                                                                                                                                                                                                                                                                                    | Description                                                                                                                                                                                                                                                                                                                                                                                                                      |
|-----------------|----------------------------------------------------------------|-------------------------------------------------------------------------------------------------------------------------------------------------------------------------------------------------------------------------------------------------------------------------------------------------------------------------------------------------------------|----------------------------------------------------------------------------------------------------------------------------------------------------------------------------------------------------------------------------------------------------------------------------------------------------------------------------------------------------------------------------------------------------------------------------------|
| Queensland      | Mining leases                                                  | <a href="https://spatial-gis.information.qld.gov.au/arcgis/services/Economy/MinesPermitsCurrent/MapServer/WMServer?request=GetCapabilities&amp;service=WMS">https://spatial-gis.information.qld.gov.au/arcgis/services/Economy/MinesPermitsCurrent/MapServer/WMServer?request=GetCapabilities&amp;service=WMS</a>                                           | This dataset includes the boundaries of Mining Leases in Queensland lodged since 1920. It was last updated in 2023. This dataset was compared to the land use layer from ACLUMP (last update between 2013-2017) through ground truthing. New polygons were drawn in ArcGIS Pro within the existing land use layer to capture newly identified mine sites.                                                                        |
| South Australia | Mineral tenements - production, Mineral Tenements - historical | <a href="https://map.sarig.sa.gov.au/">https://map.sarig.sa.gov.au/</a>                                                                                                                                                                                                                                                                                     | These datasets were last updated in 2023. They include information about current and historical extractive mineral leases. The datasets were compared with the land use mining layer, which was last updated in 2017. New polygons were drawn in ArcGIS Pro in the existing land use layer to capture new mine sites.                                                                                                            |
| Victoria        | Mines and Mineral Occurrence Sites                             | <a href="https://discover.data.vic.gov.au/dataset/mines-and-mineral-occurrence-sites1">https://discover.data.vic.gov.au/dataset/mines-and-mineral-occurrence-sites1</a>                                                                                                                                                                                     | The Current mining licences and leases show the extent of mining leases lodged with Earth Resources Regulations. Expired Mining Licences and Leases include expired mining licences. These datasets (last updated in 2023) were compared with the land use mining layer, which was last updated in 2017 through ground truthing. New polygons were drawn in ArcGIS Pro in the existing land use layer to capture new mine sites. |
| Victoria        | Current mining licences and leases                             | <a href="https://discover.data.vic.gov.au/dataset/current-mining-licences-and-leases">https://discover.data.vic.gov.au/dataset/current-mining-licences-and-leases</a>                                                                                                                                                                                       |                                                                                                                                                                                                                                                                                                                                                                                                                                  |
| New South Wales | NSW Operating mines                                            | <a href="https://gs.geoscience.nsw.gov.au/geoserver/gsnsw/ows?service=WFS&amp;version=1.0.0&amp;request=GetFeature&amp;typeName=gsnsw:dw_op_mines&amp;outputFormat=shape-zip">https://gs.geoscience.nsw.gov.au/geoserver/gsnsw/ows?service=WFS&amp;version=1.0.0&amp;request=GetFeature&amp;typeName=gsnsw:dw_op_mines&amp;outputFormat=shape-zip</a>       | The NSW Operating Mines dataset is a small subset of sites taken from the NSW Mineral Occurrence dataset, which represents an active mining operation. The NSW Current Exploration and Mining Applications Dataset includes all current applications for mineral and energy resource exploration, assessment, and production titles.                                                                                             |
| New South Wales | NSW Current Exploration and Mining Applications                | <a href="https://gs.geoscience.nsw.gov.au/geoserver/gsnsw/ows?service=WFS&amp;version=1.0.0&amp;request=GetFeature&amp;typeName=gsnsw%3Abl_titleappl&amp;outputFormat=shape-zip">https://gs.geoscience.nsw.gov.au/geoserver/gsnsw/ows?service=WFS&amp;version=1.0.0&amp;request=GetFeature&amp;typeName=gsnsw%3Abl_titleappl&amp;outputFormat=shape-zip</a> | This dataset (last updated in 2023) was compared to the land use mining layer, which was last updated in 2017 through ground truthing. New polygons were drawn in ArcGIS Pro in the existing land use layer to capture new mine sites.                                                                                                                                                                                           |

|                    |                                     |                                                                                                                                                                                                                                                                                 |                                                                                                                                                                                                                                                                                                                                                                                                                                                                                                                                                                                                                 |
|--------------------|-------------------------------------|---------------------------------------------------------------------------------------------------------------------------------------------------------------------------------------------------------------------------------------------------------------------------------|-----------------------------------------------------------------------------------------------------------------------------------------------------------------------------------------------------------------------------------------------------------------------------------------------------------------------------------------------------------------------------------------------------------------------------------------------------------------------------------------------------------------------------------------------------------------------------------------------------------------|
| Northern Territory | Northern Territory Mines            | <a href="https://data.nt.gov.au/dataset/strike---northern-territory-mines">https://data.nt.gov.au/dataset/strike---northern-territory-mines</a>                                                                                                                                 | The data (last updated in 2023) includes the point location of operating mines in NT captured from company reports and fieldwork. This is a subset of the Mineral Occurrences Database (MODAT). This dataset was compared to the land use layer from ACLUMP (last update in 2020) through ground truthing. New polygons were drawn in ArcGIS Pro in the existing land use layer to capture new mine sites.                                                                                                                                                                                                      |
| Tasmania           | Mine Lease Data                     | <a href="https://www.thelist.tas.gov.au/app/content/data/geo-meta-data-record?detailRecordUID=0c7e5395-e5db-4e3b-a6dc-db9ec9437ad8">https://www.thelist.tas.gov.au/app/content/data/geo-meta-data-record?detailRecordUID=0c7e5395-e5db-4e3b-a6dc-db9ec9437ad8</a>               | The data (last updated in 2024) includes polygon shapefiles mining leases in Tasmania. The layer includes Mining Lease polygons and production licence polygons for all mineral categories across Tasmania. This dataset was compared to the land use layer from ACLUMP (last update in 2021) through ground truthing. New polygons were drawn in ArcGIS Pro in the existing land use layer to capture new or historical mine sites.                                                                                                                                                                            |
|                    | Exploration Licence Data            | <a href="https://www.thelist.tas.gov.au/app/content/data/geo-meta-data-record?detailRecordUID=2f2dd404-2313-4262-a29d-7fc00fb1b2b8">https://www.thelist.tas.gov.au/app/content/data/geo-meta-data-record?detailRecordUID=2f2dd404-2313-4262-a29d-7fc00fb1b2b8</a>               |                                                                                                                                                                                                                                                                                                                                                                                                                                                                                                                                                                                                                 |
| Western Australia  | Western AU Abandoned Mines          | <a href="https://catalogue.data.wa.gov.au/dataset/abandoned-mines">https://catalogue.data.wa.gov.au/dataset/abandoned-mines</a>                                                                                                                                                 | The data (last updates in 2023) includes point location of abandoned and operating mines in WA. The Operating Mine Map custom data extract is a regularly updated point representation of the State's mines that have a Status of either operating or under development that appear on an annually produced map. The mines are automatically selected by Status and updated regularly. This dataset was compared to the land use layer from ACLUMP (last update in 2018) through ground truthing. New polygons were drawn in ArcGIS Pro in the existing land use layer to capture new or historical mine sites. |
|                    | Western AU Operating Mines          | <a href="https://catalogue.data.wa.gov.au/dataset/operating-mines">https://catalogue.data.wa.gov.au/dataset/operating-mines</a>                                                                                                                                                 |                                                                                                                                                                                                                                                                                                                                                                                                                                                                                                                                                                                                                 |
| Australia          | Australian Operating Mines Map 2023 | <a href="https://ecat.ga.gov.au/geonetwork/srv/eng/catalog.search#/metadata/149157">https://ecat.ga.gov.au/geonetwork/srv/eng/catalog.search#/metadata/149157</a>                                                                                                               | These two datasets include point locations of operating and closed major mining operations in Australia. The Australian mining layer was compared to these datasets to ensure any major mining operation had not been missed. New polygons were drawn in ArcGIS Pro in the final Australian mining layer to capture new or historical mine sites.                                                                                                                                                                                                                                                               |
|                    | Mines Under Care and Maintenance    | <a href="https://portal.ga.gov.au/metadata/australian-minerals-data/mines-under-care-and-maintenance/1ee95e2e-2d59-4472-9592-59b1339dd836">https://portal.ga.gov.au/metadata/australian-minerals-data/mines-under-care-and-maintenance/1ee95e2e-2d59-4472-9592-59b1339dd836</a> |                                                                                                                                                                                                                                                                                                                                                                                                                                                                                                                                                                                                                 |

**Table S4. Tertiary classes from the CLUMP 23 dataset were used to map the intensive use class.**

| <b>Land use Code used in CLUMP 23</b> | <b>Tertiary classification</b>               | <b>Secondary Classification</b>         | <b>Primary classification</b> |
|---------------------------------------|----------------------------------------------|-----------------------------------------|-------------------------------|
| 5.1.0                                 | 5.1.0 Intensive horticulture                 | 5.1 Intensive horticulture              | 5 Intensive uses              |
| 5.1.1                                 | 5.1.1 Production nurseries                   | 5.1 Intensive horticulture              | 5 Intensive uses              |
| 5.1.2                                 | 5.1.2 Shadehouses                            | 5.1 Intensive horticulture              | 5 Intensive uses              |
| 5.1.3                                 | 5.1.3 Glasshouses                            | 5.1 Intensive horticulture              | 5 Intensive uses              |
| 5.1.4                                 | 5.1.4 Glasshouses (hydroponic)               | 5.1 Intensive horticulture              | 5 Intensive uses              |
| 5.1.5                                 | 5.1.5 Abandoned intensive horticulture       | 5.1 Intensive horticulture              | 5 Intensive uses              |
| 5.2.0                                 | 5.2.0 Intensive animal production            | 5.2 Intensive animal production         | 5 Intensive uses              |
| 5.2.1                                 | 5.2.1 Dairy sheds and yards                  | 5.2 Intensive animal production         | 5 Intensive uses              |
| 5.2.2                                 | 5.2.2 Feedlots                               | 5.2 Intensive animal production         | 5 Intensive uses              |
| 5.2.3                                 | 5.2.3 Poultry farms                          | 5.2 Intensive animal production         | 5 Intensive uses              |
| 5.2.4                                 | 5.2.4 Piggeries                              | 5.2 Intensive animal production         | 5 Intensive uses              |
| 5.2.5                                 | 5.2.5 Aquaculture                            | 5.2 Intensive animal production         | 5 Intensive uses              |
| 5.2.6                                 | 5.2.6 Horse studs                            | 5.2 Intensive animal production         | 5 Intensive uses              |
| 5.2.7                                 | 5.2.7 Saleyards/stockyards                   | 5.2 Intensive animal production         | 5 Intensive uses              |
| 5.2.8                                 | 5.2.8 Abandoned intensive animal production  | 5.2 Intensive animal production         | 5 Intensive uses              |
| 5.3.0                                 | 5.3.0 Manufacturing and industrial           | 5.3 Manufacturing and industrial        | 5 Intensive uses              |
| 5.3.1                                 | 5.3.1 General purpose factory                | 5.3 Manufacturing and industrial        | 5 Intensive uses              |
| 5.3.2                                 | 5.3.2 Food processing factory                | 5.3 Manufacturing and industrial        | 5 Intensive uses              |
| 5.3.3                                 | 5.3.3 Major industrial complex               | 5.3 Manufacturing and industrial        | 5 Intensive uses              |
| 5.3.4                                 | 5.3.4 Bulk grain storage                     | 5.3 Manufacturing and industrial        | 5 Intensive uses              |
| 5.3.5                                 | 5.3.5 Abattoirs                              | 5.3 Manufacturing and industrial        | 5 Intensive uses              |
| 5.3.6                                 | 5.3.6 Oil refinery                           | 5.3 Manufacturing and industrial        | 5 Intensive uses              |
| 5.3.7                                 | 5.3.7 Sawmill                                | 5.3 Manufacturing and industrial        | 5 Intensive uses              |
| 5.3.8                                 | 5.3.8 Abandoned manufacturing and industrial | 5.3 Manufacturing and industrial        | 5 Intensive uses              |
| 5.4.0                                 | 5.4.0 Residential and farm infrastructure    | 5.4 Residential and farm infrastructure | 5 Intensive uses              |
| 5.4.1                                 | 5.4.1 Urban residential                      | 5.4 Residential and farm infrastructure | 5 Intensive uses              |
| 5.4.2                                 | 5.4.2 Rural residential with agriculture     | 5.4 Residential and farm infrastructure | 5 Intensive uses              |

|       |                                                |                                         |                  |
|-------|------------------------------------------------|-----------------------------------------|------------------|
| 5.4.3 | 5.4.3 Rural residential without agriculture    | 5.4 Residential and farm infrastructure | 5 Intensive uses |
| 5.4.4 | 5.4.4 Remote communities                       | 5.4 Residential and farm infrastructure | 5 Intensive uses |
| 5.4.5 | 5.4.5 Farm buildings/infrastructure            | 5.4 Residential and farm infrastructure | 5 Intensive uses |
| 5.5.0 | 5.5.0 Services                                 | 5.5 Services                            | 5 Intensive uses |
| 5.5.1 | 5.5.1 Commercial services                      | 5.5 Services                            | 5 Intensive uses |
| 5.5.2 | 5.5.2 Public services                          | 5.5 Services                            | 5 Intensive uses |
| 5.5.3 | 5.5.3 Recreation and culture                   | 5.5 Services                            | 5 Intensive uses |
| 5.5.4 | 5.5.4 Defence facilities - urban               | 5.5 Services                            | 5 Intensive uses |
| 5.5.5 | 5.5.5 Research facilities                      | 5.5 Services                            | 5 Intensive uses |
| 5.6.0 | 5.6.0 Utilities                                | 5.6 Utilities                           | 5 Intensive uses |
| 5.6.1 | 5.6.1 Fuel powered electricity generation      | 5.6 Utilities                           | 5 Intensive uses |
| 5.6.2 | 5.6.2 Hydro electricity generation             | 5.6 Utilities                           | 5 Intensive uses |
| 5.6.3 | 5.6.3 Wind electricity generation              | 5.6 Utilities                           | 5 Intensive uses |
| 5.6.4 | 5.6.4 Solar electricity generation             | 5.6 Utilities                           | 5 Intensive uses |
| 5.6.5 | 5.6.5 Electricity substations and transmission | 5.6 Utilities                           | 5 Intensive uses |
| 5.6.6 | 5.6.6 Gas treatment, storage and transmission  | 5.6 Utilities                           | 5 Intensive uses |
| 5.6.7 | 5.6.7 Water extraction and transmission        | 5.6 Utilities                           | 5 Intensive uses |
| 5.7.1 | 5.7.1 Airports/aerodromes                      | 5.7 Transport and communication         | 5 Intensive uses |
| 5.7.4 | 5.7.4 Ports and water transport                | 5.7 Transport and communication         | 5 Intensive uses |
| 5.7.5 | 5.7.5 Navigation and communication             | 5.7 Transport and communication         | 5 Intensive uses |

**Table S5. Tertiary classes from the CLUMP 23 dataset were used to map croplands**

| <b>Land use<br/>Code used by<br/>CLUMP 23</b> | <b>Tertiary<br/>classification</b>      | <b>Secondary<br/>Classification</b> | <b>Primary classification</b>                         |
|-----------------------------------------------|-----------------------------------------|-------------------------------------|-------------------------------------------------------|
| 3.3.0                                         | 3.3.0 Cropping                          | 3.3 Cropping                        | 3 Production from dryland agriculture and plantations |
| 3.3.1                                         | 3.3.1 Cereals                           | 3.3 Cropping                        | 3 Production from dryland agriculture and plantations |
| 3.3.2                                         | 3.3.2 Beverage and<br>spice crops       | 3.3 Cropping                        | 3 Production from dryland agriculture and plantations |
| 3.3.3                                         | 3.3.3 Hay and silage                    | 3.3 Cropping                        | 3 Production from dryland agriculture and plantations |
| 3.3.4                                         | 3.3.4 Oilseeds                          | 3.3 Cropping                        | 3 Production from dryland agriculture and plantations |
| 3.3.5                                         | 3.3.5 Sugar                             | 3.3 Cropping                        | 3 Production from dryland agriculture and plantations |
| 3.3.6                                         | 3.3.6 Cotton                            | 3.3 Cropping                        | 3 Production from dryland agriculture and plantations |
| 3.3.8                                         | 3.3.8 Pulses                            | 3.3 Cropping                        | 3 Production from dryland agriculture and plantations |
| 3.4.0                                         | 3.4.0 Perennial<br>horticulture         | 3.4 Perennial<br>horticulture       | 3 Production from dryland agriculture and plantations |
| 3.4.1                                         | 3.4.1 Tree fruits                       | 3.4 Perennial<br>horticulture       | 3 Production from dryland agriculture and plantations |
| 3.4.2                                         | 3.4.2 Olives                            | 3.4 Perennial<br>horticulture       | 3 Production from dryland agriculture and plantations |
| 3.4.3                                         | 3.4.3 Tree nuts                         | 3.4 Perennial<br>horticulture       | 3 Production from dryland agriculture and plantations |
| 3.4.4                                         | 3.4.4 Vine fruits                       | 3.4 Perennial<br>horticulture       | 3 Production from dryland agriculture and plantations |
| 3.4.5                                         | 3.4.5 Shrub berries<br>and fruits       | 3.4 Perennial<br>horticulture       | 3 Production from dryland agriculture and plantations |
| 3.4.6                                         | 3.4.6 Perennial<br>flowers and bulbs    | 3.4 Perennial<br>horticulture       | 3 Production from dryland agriculture and plantations |
| 3.4.7                                         | 3.4.7 Perennial<br>vegetables and herbs | 3.4 Perennial<br>horticulture       | 3 Production from dryland agriculture and plantations |
| 3.4.8                                         | 3.4.8 Citrus                            | 3.4 Perennial<br>horticulture       | 3 Production from dryland agriculture and plantations |
| 3.4.9                                         | 3.4.9 Grapes                            | 3.4 Perennial<br>horticulture       | 3 Production from dryland agriculture and plantations |
| 3.5.0                                         | 3.5.0 Seasonal<br>horticulture          | 3.5 Seasonal<br>horticulture        | 3 Production from dryland agriculture and plantations |
| 3.5.2                                         | 3.5.2 Seasonal<br>flowers and bulbs     | 3.5 Seasonal<br>horticulture        | 3 Production from dryland agriculture and plantations |
| 3.5.3                                         | 3.5.3 Seasonal<br>vegetables and herbs  | 3.5 Seasonal<br>horticulture        | 3 Production from dryland agriculture and plantations |
| 3.6.0                                         | 3.6.0 Land in<br>transition             | 3.6 Land in<br>transition           | 3 Production from dryland agriculture and plantations |
| 3.6.1                                         | 3.6.1 Degraded land                     | 3.6 Land in<br>transition           | 3 Production from dryland agriculture and plantations |

|       |                                          |                                      |                                                         |
|-------|------------------------------------------|--------------------------------------|---------------------------------------------------------|
| 3.6.2 | 3.6.2 Abandoned land                     | 3.6 Land in transition               | 3 Production from dryland agriculture and plantations   |
| 3.6.3 | 3.6.3 Land under rehabilitation          | 3.6 Land in transition               | 3 Production from dryland agriculture and plantations   |
| 3.6.5 | 3.6.5 Abandoned perennial horticulture   | 3.6 Land in transition               | 3 Production from dryland agriculture and plantations   |
| 4.3.0 | 4.3.0 Irrigated cropping                 | 4.3 Irrigated cropping               | 4 Production from irrigated agriculture and plantations |
| 4.3.1 | 4.3.1 Irrigated cereals                  | 4.3 Irrigated cropping               | 4 Production from irrigated agriculture and plantations |
| 4.3.2 | 4.3.2 Irrigated beverage and spice crops | 4.3 Irrigated cropping               | 4 Production from irrigated agriculture and plantations |
| 4.3.3 | 4.3.3 Irrigated hay and silage           | 4.3 Irrigated cropping               | 4 Production from irrigated agriculture and plantations |
| 4.3.4 | 4.3.4 Irrigated oilseeds                 | 4.3 Irrigated cropping               | 4 Production from irrigated agriculture and plantations |
| 4.3.5 | 4.3.5 Irrigated sugar                    | 4.3 Irrigated cropping               | 4 Production from irrigated agriculture and plantations |
| 4.3.6 | 4.3.6 Irrigated cotton                   | 4.3 Irrigated cropping               | 4 Production from irrigated agriculture and plantations |
| 4.3.7 | 4.3.7 Irrigated alkaloid poppies         | 4.3 Irrigated cropping               | 4 Production from irrigated agriculture and plantations |
| 4.3.8 | 4.3.8 Irrigated pulses                   | 4.3 Irrigated cropping               | 4 Production from irrigated agriculture and plantations |
| 4.3.9 | 4.3.9 Irrigated rice                     | 4.3 Irrigated cropping               | 4 Production from irrigated agriculture and plantations |
| 4.4.0 | 4.4.0 Irrigated perennial horticulture   | 4.4 Irrigated perennial horticulture | 4 Production from irrigated agriculture and plantations |
| 4.4.1 | 4.4.1 Irrigated tree fruits              | 4.4 Irrigated perennial horticulture | 4 Production from irrigated agriculture and plantations |
| 4.4.2 | 4.4.2 Irrigated olives                   | 4.4 Irrigated perennial horticulture | 4 Production from irrigated agriculture and plantations |
| 4.4.3 | 4.4.3 Irrigated tree nuts                | 4.4 Irrigated perennial horticulture | 4 Production from irrigated agriculture and plantations |
| 4.4.4 | 4.4.4 Irrigated vine fruits              | 4.4 Irrigated perennial horticulture | 4 Production from irrigated agriculture and plantations |

|       |                                                  |                                      |                                                         |
|-------|--------------------------------------------------|--------------------------------------|---------------------------------------------------------|
| 4.4.5 | 4.4.5 Irrigated shrub berries and fruits         | 4.4 Irrigated perennial horticulture | 4 Production from irrigated agriculture and plantations |
| 4.4.6 | 4.4.6 Irrigated perennial flowers and bulbs      | 4.4 Irrigated perennial horticulture | 4 Production from irrigated agriculture and plantations |
| 4.4.7 | 4.4.7 Irrigated perennial vegetables and herbs   | 4.4 Irrigated perennial horticulture | 4 Production from irrigated agriculture and plantations |
| 4.4.8 | 4.4.8 Irrigated citrus                           | 4.4 Irrigated perennial horticulture | 4 Production from irrigated agriculture and plantations |
| 4.4.9 | 4.4.9 Irrigated grapes                           | 4.4 Irrigated perennial horticulture | 4 Production from irrigated agriculture and plantations |
| 4.5.0 | 4.5.0 Irrigated seasonal horticulture            | 4.5 Irrigated seasonal horticulture  | 4 Production from irrigated agriculture and plantations |
| 4.5.1 | 4.5.1 Irrigated seasonal fruits                  | 4.5 Irrigated seasonal horticulture  | 4 Production from irrigated agriculture and plantations |
| 4.5.2 | 4.5.2 Irrigated seasonal flowers and bulbs       | 4.5 Irrigated seasonal horticulture  | 4 Production from irrigated agriculture and plantations |
| 4.5.3 | 4.5.3 Irrigated seasonal vegetables and herbs    | 4.5 Irrigated seasonal horticulture  | 4 Production from irrigated agriculture and plantations |
| 4.5.4 | 4.5.4 Irrigated turf farming                     | 4.5 Irrigated seasonal horticulture  | 4 Production from irrigated agriculture and plantations |
| 4.6.0 | 4.6.0 Irrigated land in transition               | 4.6 Irrigated land in transition     | 4 Production from irrigated agriculture and plantations |
| 4.6.1 | 4.6.1 Degraded irrigated land                    | 4.6 Irrigated land in transition     | 4 Production from irrigated agriculture and plantations |
| 4.6.2 | 4.6.2 Abandoned irrigated land                   | 4.6 Irrigated land in transition     | 4 Production from irrigated agriculture and plantations |
| 4.6.3 | 4.6.3 Irrigated land under rehabilitation        | 4.6 Irrigated land in transition     | 4 Production from irrigated agriculture and plantations |
| 4.6.5 | 4.6.5 Abandoned irrigated perennial horticulture | 4.6 Irrigated land in transition     | 4 Production from irrigated agriculture and plantations |

**Table S6. Tertiary classes from the CLUMP 23 dataset were used to map modified pasturelands**

| <b>Land use Code used by CLUMP 23</b> | <b>Tertiary classification</b>            | <b>Secondary Classification</b>         | <b>Primary classification</b>                           |
|---------------------------------------|-------------------------------------------|-----------------------------------------|---------------------------------------------------------|
| 3.2.0                                 | 3.2.0 Grazing modified pastures           | 3.2 Grazing modified pastures           | 3 Production from dryland agriculture and plantations   |
| 3.2.1                                 | 3.2.1 Native/exotic pasture mosaic        | 3.2 Grazing modified pastures           | 3 Production from dryland agriculture and plantations   |
| 3.2.2                                 | 3.2.2 Woody fodder plants                 | 3.2 Grazing modified pastures           | 3 Production from dryland agriculture and plantations   |
| 3.2.3                                 | 3.2.3 Pasture legumes                     | 3.2 Grazing modified pastures           | 3 Production from dryland agriculture and plantations   |
| 3.2.4                                 | 3.2.4 Pasture legume/grass mixtures       | 3.2 Grazing modified pastures           | 3 Production from dryland agriculture and plantations   |
| 3.2.5                                 | 3.2.5 Sown grasses                        | 3.2 Grazing modified pastures           | 3 Production from dryland agriculture and plantations   |
| 4.2.0                                 | 4.2.0 Grazing irrigated modified pastures | 4.2 Grazing irrigated modified pastures | 4 Production from irrigated agriculture and plantations |
| 4.2.1                                 | 4.2.1 Irrigated woody fodder plants       | 4.2 Grazing irrigated modified pastures | 4 Production from irrigated agriculture and plantations |
| 4.2.2                                 | 4.2.2 Irrigated pasture legumes           | 4.2 Grazing irrigated modified pastures | 4 Production from irrigated agriculture and plantations |
| 4.2.3                                 | 4.2.3 Irrigated legume/grass mixtures     | 4.2 Grazing irrigated modified pastures | 4 Production from irrigated agriculture and plantations |
| 4.2.4                                 | 4.2.4 Irrigated sown grasses              | 4.2 Grazing irrigated modified pastures | 4 Production from irrigated agriculture and plantations |

**Table S7.** Open street maps SQL attribute and data tag queries used for each road type and hiking trail (sealed, unsealed, track, patch)

| Feature Type            | Layer Name | Key Tag(s)                     | Filter / Selection Criteria                                                                                                                                                                                                                                                                                                                                                                                                                                                                                                                                                                                          | Notes                                                                                                                            |
|-------------------------|------------|--------------------------------|----------------------------------------------------------------------------------------------------------------------------------------------------------------------------------------------------------------------------------------------------------------------------------------------------------------------------------------------------------------------------------------------------------------------------------------------------------------------------------------------------------------------------------------------------------------------------------------------------------------------|----------------------------------------------------------------------------------------------------------------------------------|
| Sealed Roads            | osm_sealed | highway, other_tags            | highway IN ('bus_guideway', 'bus_stop', 'busway', 'construction', 'corridor', 'crossing', 'emergency_bay', 'escape', 'living_street', 'motorway', 'motorway_link', 'platform', 'primary', 'primary_link', 'raceway', 'razed', 'residential', 'rest_area', 'road', 'scramble', 'secondary', 'secondary_link', 'service', 'services', 'tertiary', 'tertiary_link', 'trunk', 'trunk_link') AND NOT (other_tags LIKE '%"surface"=>"unpaved"% ' OR other_tags LIKE '%"surface"=>"dirt"% ' OR other_tags LIKE '%"surface"=>"gravel"% ' OR other_tags LIKE '%"surface"=>"sand"% ' OR other_tags LIKE '%"4wd_only"=>"yes"%') | Includes a wide range of drivable roads and highways; explicitly excludes unpaved/dirt/gravel/sand surfaces and 4WD-only tracks. |
| Unsealed Roads / Tracks | osm_tracks | highway, other_tags, tracktype | highway IN ('secondary', 'tertiary', 'track', 'unclassified', 'service') AND (other_tags LIKE '%"surface"=>"unpaved"% ' OR other_tags LIKE '%"surface"=>"dirt"% ' OR other_tags LIKE '%"surface"=>"gravel"% ' OR other_tags LIKE '%"surface"=>"sand"% ' OR other_tags IS NULL OR other_tags LIKE '%"tracktype"=>"grade1"% ' OR other_tags LIKE '%"tracktype"=>"grade2"% ' OR other_tags LIKE '%"tracktype"=>"grade3"% ' OR other_tags LIKE '%"tracktype"=>"grade4"% ' OR other_tags LIKE '%"tracktype"=>"grade5"%')                                                                                                  | Selects unsealed or dirt tracks and unclassified roads, including those with missing surface tags.                               |
| Paths / Footpaths       | osm_paths  | highway                        | highway IN ('path')                                                                                                                                                                                                                                                                                                                                                                                                                                                                                                                                                                                                  | Captures OSM features explicitly tagged as pedestrian paths.                                                                     |

**Table S8.** National Roads Dataset (Geoscape 2024) street maps SQL attribute and data tag queries used for each road type and hiking trail (sealed, unsealed, track, patch)

55

| <b>Feature Type</b>       | <b>Source / CRS</b>             | <b>Layer Name</b> | <b>Subset Logic</b>                                                                                                                                                        |
|---------------------------|---------------------------------|-------------------|----------------------------------------------------------------------------------------------------------------------------------------------------------------------------|
| National roads (sealed)   | `national_roads_orig` (GDA2020) | nat_sealed        | hierarchy IN ('LOCAL ROAD', 'NATIONAL OR STATE HIGHWAY', 'ARTERIAL ROAD', 'NULL', 'COLLECTOR ROAD', 'ACCESS ROAD', 'SUB-ARTERIAL ROAD', 'BUSWAY') AND surface = 'SEALED'   |
| National roads (unsealed) | `national_roads_orig` (GDA2020) | nat_tracks        | hierarchy IN ('LOCAL ROAD', 'NATIONAL OR STATE HIGHWAY', 'ARTERIAL ROAD', 'NULL', 'COLLECTOR ROAD', 'ACCESS ROAD', 'SUB-ARTERIAL ROAD', 'BUSWAY') AND surface = 'UNSEALED' |
| Footpaths (national)      | `national_roads_orig` (GDA2020) | nat_paths         | hierarchy IN ('FOOTPATH')                                                                                                                                                  |

**Table S9. Scores assigned to pressures through the visual inspection of high-resolution satellite images**

| Pressure                   | Direct  | Indirect |      |      |       |      |
|----------------------------|---------|----------|------|------|-------|------|
|                            | 100 m   | 300      | 500  | 1000 | 2750  | 5000 |
| <b>Intensive Uses</b>      | 10      |          |      |      |       |      |
| <b>Croplands</b>           | 7       |          |      |      |       |      |
| <b>Native Pastures</b>     | 2       |          |      |      |       |      |
| <b>Modified Pastures</b>   | 4       |          |      |      |       |      |
| <b>Forestry</b>            | 7       |          |      |      |       |      |
| <b>Mining</b>              | 10      |          |      |      |       |      |
| <b>Buildings</b>           | 10      |          |      |      |       |      |
| <b>Population density</b>  | 0,1,2,3 |          |      |      |       |      |
| <b>Reservoirs/dams</b>     | 1       | 2        | 3    |      |       |      |
| <b>Farm Dams</b>           | 5       | 5        | 5    |      |       |      |
| <b>Roads- Sealed</b>       | 8       | 8        | 4.5  | 1.5  | 0.325 | 0.25 |
| <b>Roads- Unsealed</b>     | 8       | 8        | 1.35 | 0.65 | 0.25  | 0.25 |
| <b>Railways</b>            | 8       |          |      |      |       |      |
| <b>Pipelines</b>           | 3       | 1.2      | 0.65 | 0.25 | 0.25  |      |
| <b>Transmission lines</b>  | 3       | 1.2      | 0.65 | 0.25 | 0.25  |      |
| <b>Hiking Trails</b>       | 0.9     |          |      |      |       |      |
| <b>Navigable waterways</b> | 4       | 1.5      | 0.65 | 0.25 | 0.25  | 0.25 |

60

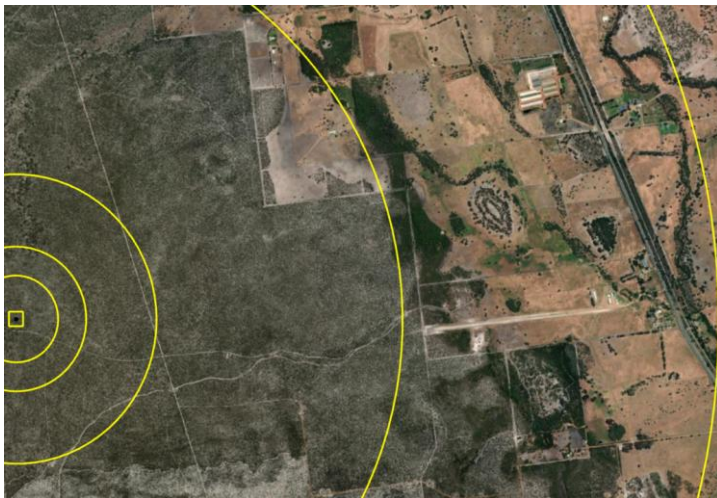

**Figure S1. Validation plots. The square main plot (100mx100m) for recording direct pressure, and concentric buffers for assessing indirect pressures. The imagery displayed is World Imagery from ArcGIS Map Service, and the source is Esri, Maxar, Earthstar Geographics, and the GIS User Community.**

65

**Table S10. Pressure class total area, including standard error and confidence intervals calculated through the accuracy assessment.**

| Pressure class     | Area for each pressure class   |                               |                              |
|--------------------|--------------------------------|-------------------------------|------------------------------|
|                    | Mapped area<br>Km <sup>2</sup> | SE(+/-)<br>(Km <sup>2</sup> ) | CI 95%<br>(Km <sup>2</sup> ) |
| <b>No pressure</b> | 2,429,491                      | 47,890                        | 93,862                       |
| <b>Very Low</b>    | 223,451                        | 34,133                        | 66,900                       |
| <b>Low</b>         | 3,903,901                      | 52,309                        | 102,525                      |
| <b>Moderate</b>    | 255,383                        | 24,926                        | 48,853                       |
| <b>High</b>        | 879,820                        | 29,218                        | 57,266                       |

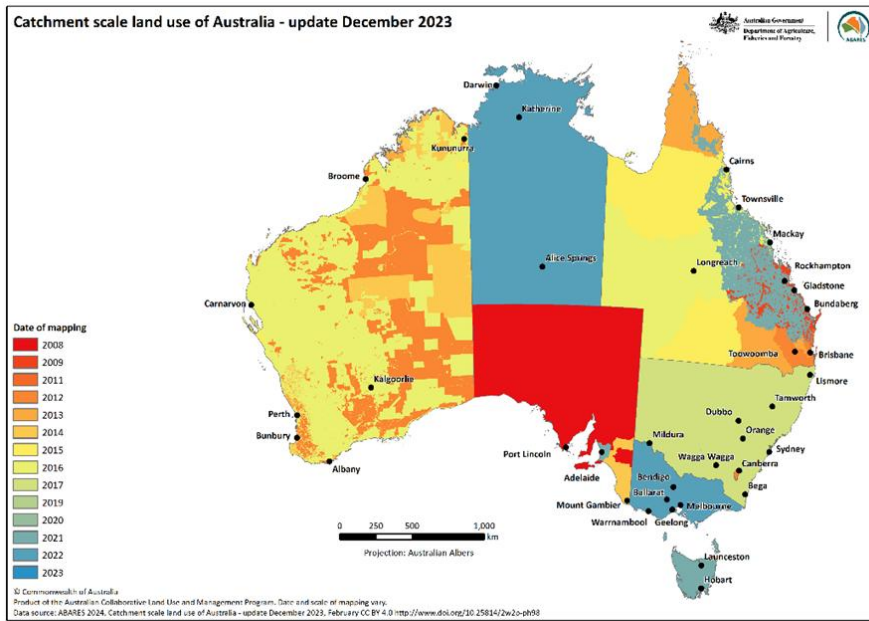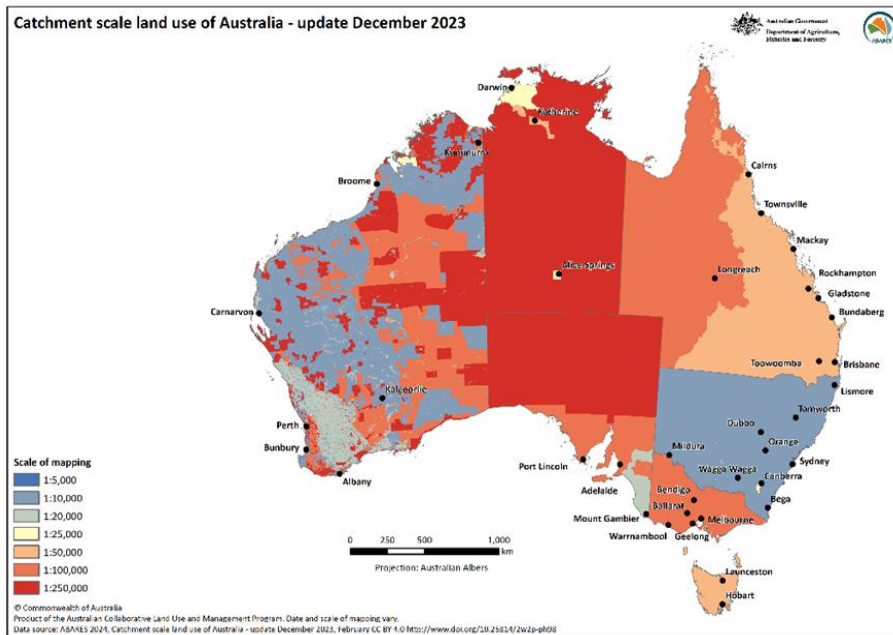

**Figure S2. Year and resolution of mapping for the source vector data used to compile the ABARES 2023 Land Use of Australia layer. Maps taken from <https://www.agriculture.gov.au/abares/aclump/land-use/catchment-scale-land-use-and-commodities-update-2023> (ABARES 2024).**

75

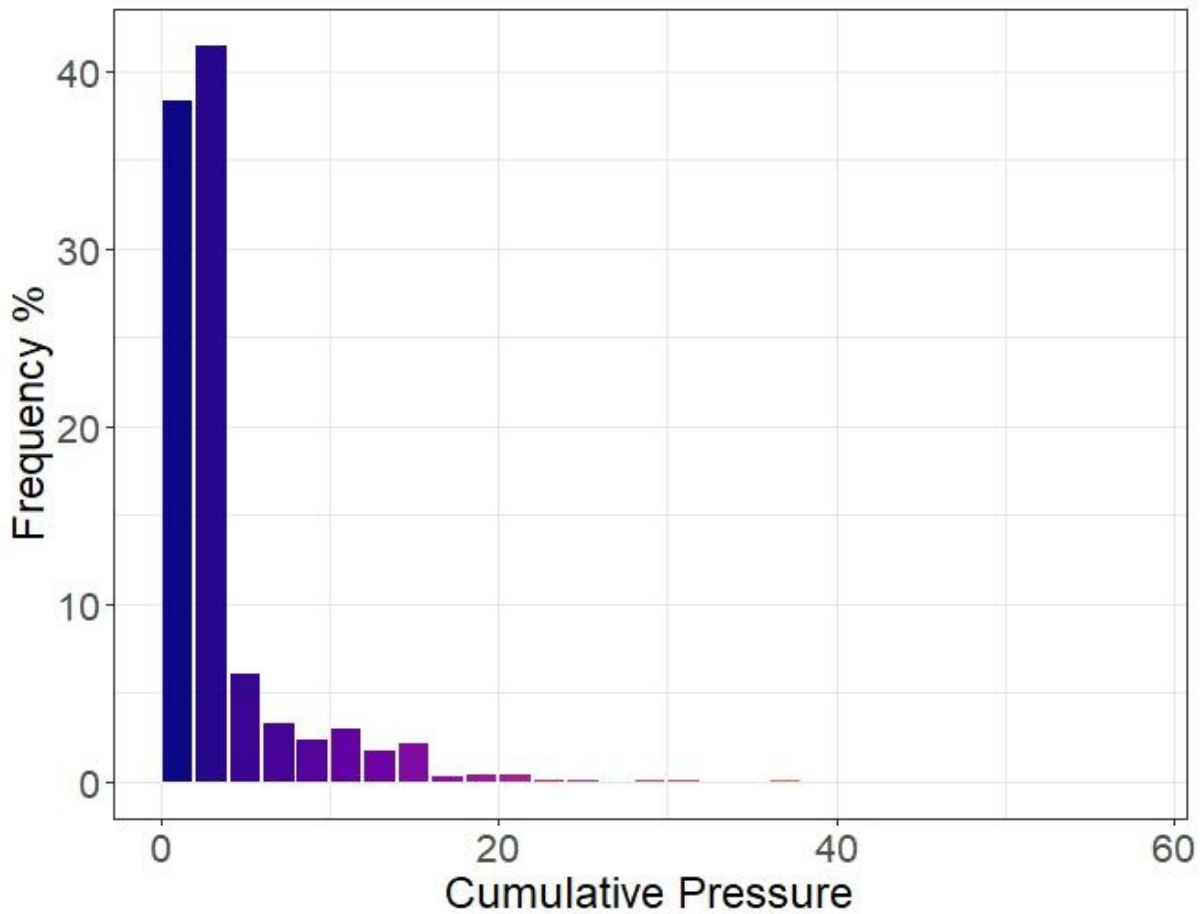

80 **Fig S3. Distribution of cumulative Human Industrial Footprint (HIF) scores across Australia. The histogram shows the frequency of pixels for each cumulative pressure value, highlighting the strong left-skewed distribution typical of spatial datasets dominated by areas with low or minimal human influence. Most of the Australian landscape has low HIF values (< 6), reflecting extensive regions with minimal industrial pressures, while only a small proportion exhibits high cumulative pressure scores (> 10), corresponding primarily to urban and intensively used area**
